# Supplementary material for: Integrative proteomics and metabolomics analysis reveals the toxicity of cationic liposomes to human normal hepatocyte cell line L02
Source: Royal Society of Chemistry journal article supplement (doi:10.1039/c8mo00132d), 2018-09-18
Supplement: c8mo00132d1.pdf [file c8mo00132d1.pdf]

## Supporting Information

### **Integrative Proteomics and Metabolomics Analysis Reveals the Toxicity of Cationic Liposomes to Human Normal Hepatocyte Cell Line L02**

Jing Yu<sup>a,1</sup>, Jun Chen<sup>a,1</sup>, Hongxia Zhao<sup>b</sup>, Jie Gao<sup>b</sup>, Ying Li<sup>a</sup>, Yang Li<sup>a</sup>, Jiyang Xue<sup>c</sup>, Arik Dahan<sup>d</sup>, Duxin Sun<sup>e,\*</sup>, Guoqing Zhang<sup>a,\*</sup>, Hai Zhang<sup>c,\*</sup>

<sup>1</sup>These authors contributed equally to this work.

<sup>a</sup> Department of Pharmacy, Eastern Hepatobiliary Surgery Hospital, Second Military Medical University, Shanghai 200438, China

<sup>b</sup> School of Pharmacy, Second Military Medical University, Shanghai 200433, China

<sup>c</sup> Department of Pharmacy, Shanghai First Maternity and Infant Hospital, Tongji University School of Medicine, Shanghai 201204, China

<sup>d</sup> Department of Clinical Biochemistry and Pharmacology, School of Pharmacy, Ben-Gurion University of the Negev, Beer-Sheva 84105, Israel

<sup>e</sup> Department of Pharmaceutical Science, College of Pharmacy, University of Michigan, Ann Arbor, MI 48109, USA

Corresponding Author:

Duxin Sun

\*E-mail: duxins@umich.edu. Tel/Fax: +91 040 23134502

Guoqing Zhang

\*E-mail: gqzhang@smmu.edu.cn. Tel/Fax: +8621-81875571

Hai Zhang

\*E-mail: zhxdks2005@126.com. Tel/Fax: +8621-20261151

## Table of Contents:

Figure S1. Representative total ion current chromatograms of significantly changed metabolites in positive and negative ion mode using the two kinds of columns. The labels of A, B were obtained from the T3 column in positive and negative ion mode, respectively; with the labels of C, D from the Amide column in positive and negative mode, respectively.

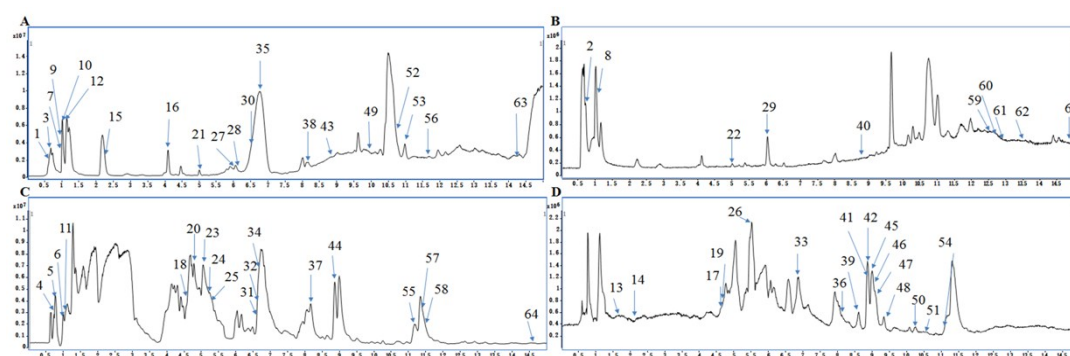

Figure S2. Hierarchical clustering and the heatmap based on the 65 metabolites showed significant differences between CLs and control groups from metabolomics data.

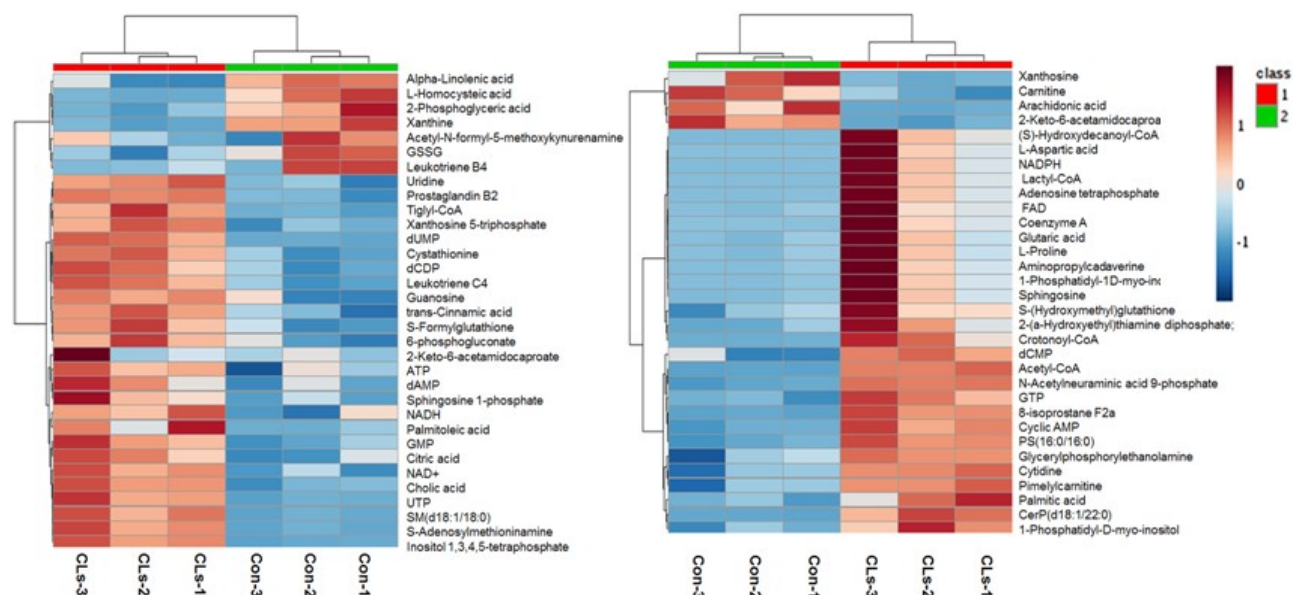

Table S1. Identification details of the metabolites that displayed significant changes in the control and the CLs groups by UHPLC-Q-TOF/MS

| No. | RT (min) | VIP   | p-val | m/z      | Column | Ion | Metabolites                                      | FC(CLs/C) |
|-----|----------|-------|-------|----------|--------|-----|--------------------------------------------------|-----------|
| 1   | 0.6892   | 1.503 | 0.046 | 337.9483 | T3     | M+H | Leukotriene B4                                   | -0.027    |
| 2   | 0.7036   | 0.876 | 0.015 | 160.11   | T3     | M-H | Carnitine                                        | -0.37     |
| 3   | 0.736    | 1.552 | 0.003 | 309.0783 | T3     | M+H | dUMP                                             | 1.761     |
| 4   | 0.7561   | 1.419 | 0.011 | 330.0575 | AMIDE  | M+H | Cyclic AMP                                       | 3.016     |
| 5   | 0.8046   | 2.61  | 0.026 | 786.6012 | AMIDE  | M+H | FAD                                              | 24.62     |
| 6   | 1.0143   | 1.261 | 0.035 | 470.1286 | AMIDE  | M+H | 2-( $\alpha$ -Hydroxyethyl) thiamine diphosphate | 1.652     |
| 7   | 1.0219   | 1.457 | 0.015 | 613.1449 | T3     | M+H | GSSG                                             | -8.279    |
| 8   | 1.024    | 4.529 | 0.012 | 306.0908 | T3     | M-H | dCMP                                             | 10.143    |
| 9   | 1.033    | 1.252 | 0.043 | 666.1099 | T3     | M+H | NADH                                             | 0.696     |
| 10  | 1.063    | 1.373 | 0.017 | 193.0187 | T3     | M+H | Citric acid                                      | 2.091     |
| 11  | 1.087    | 1.402 | 0.031 | 153.0251 | AMIDE  | M+H | Xanthine                                         | -0.13     |
| 12  | 1.159    | 1.336 | 0.021 | 364.1382 | T3     | M+H | GMP                                              | 0.068     |
| 13  | 1.621    | 2.441 | 0     | 61.9887  | AMIDE  | M-H | Carbonic acid                                    | 2.923     |
| 14  | 2.085    | 3.022 | 0     | 388.2526 | AMIDE  | M-H | N-Acetylneuraminic acid 9-phosphate              | 4.106     |
| 15  | 2.481    | 2.824 | 0.004 | 524.3719 | T3     | M+H | GTP                                              | 4.445     |

|    |       |       |       |          |       |     |                                       |         |
|----|-------|-------|-------|----------|-------|-----|---------------------------------------|---------|
| 16 | 4.116 | 1.213 | 0.047 | 409.1717 | T3    | M+H | Cholic acid                           | 1.274   |
| 17 | 4.649 | 1.179 | 0     | 848.6473 | AMIDE | M-H | Tiglyl-CoA                            | 0.708   |
| 18 | 4.685 | 13.21 | 0.045 | 134.1176 | AMIDE | M+H | L-Aspartate                           | 638.242 |
| 19 | 4.725 | 2.155 | 0     | 303.0834 | AMIDE | M-H | Arachidonic acid                      | -2.35   |
| 20 | 4.897 | 1.104 | 0.006 | 836.1088 | AMIDE | M+H | Crotonoyl-CoA                         | 2.169   |
| 21 | 4.991 | 1.519 | 0.036 | 265.0152 | T3    | M+H | Acetyl-N-formyl-5-methoxykynurenamine | -0.065  |
| 22 | 4.992 | 1.658 | 0.012 | 185.0378 | T3    | M-H | 2-Phosphoglyceric acid                | -0.05   |
| 23 | 5.05  | 1.272 | 0.002 | 938.1697 | AMIDE | M+H | (S)-Hydroxydecanoyl-CoA               | 4.07    |
| 24 | 5.193 | 1.39  | 0.036 | 768.4021 | AMIDE | M+H | Coenzyme A                            | 6.502   |
| 25 | 5.207 | 1.457 | 0.049 | 188.1123 | AMIDE | M+H | 2-Keto-6-acetamidocaproate            | 0.045   |
| 26 | 5.577 | 2.245 | 0.021 | 283.0689 | AMIDE | M-H | Xanthosine                            | -2.462  |
| 27 | 6.038 | 1.722 | 0.001 | 356.0513 | T3    | M+H | S-Adenosylmethioninamine              | 5.967   |
| 28 | 6.041 | 1.709 | 0.001 | 732.0897 | T3    | M+H | SM(d18:1/18:0)                        | 0.547   |
| 29 | 6.056 | 2.398 | 0     | 353.0642 | T3    | M-H | 8-isoprostane F2a                     | 2.379   |
| 30 | 6.516 | 1.634 | 0.003 | 332.1923 | T3    | M+H | dAMP                                  | 0.196   |
| 31 | 6.692 | 1.051 | 0.025 | 745.7027 | AMIDE | M+H | NADPH                                 | 3.593   |
| 32 | 6.719 | 1.245 | 0.022 | 587.0449 | AMIDE | M+H | Adenosine tetraphosphate              | 4.793   |
| 33 | 6.787 | 1.942 | 0     | 182.0558 | AMIDE | M-H | L-Homocysteic acid                    | -2.033  |
| 34 | 6.788 | 1.25  | 0.025 | 840.7702 | AMIDE | M+H | Lactyl-CoA                            | 5.032   |

|    |       |       |       |          |       |     |                                            |        |
|----|-------|-------|-------|----------|-------|-----|--------------------------------------------|--------|
| 35 | 6.803 | 1.707 | 0.001 | 485.1685 | T3    | M+H | UTP                                        | 0.311  |
| 36 | 8.152 | 1.207 | 0.006 | 386.0432 | AMIDE | M-H | dCDP                                       | 0.811  |
| 37 | 8.232 | 1.861 | 0     | 500.2886 | AMIDE | M+H | Inositol 1,3,4,5-tetrphosphate             | 2.766  |
| 38 | 8.315 | 1.758 | 0     | 380.2848 | T3    | M+H | Sphingosine 1-phosphate                    | 0.045  |
| 39 | 8.584 | 1.229 | 0.006 | 275.0888 | AMIDE | M-H | 6-phosphogluconate                         | 0.905  |
| 40 | 8.857 | 6.074 | 0.01  | 302.1015 | T3    | M-H | Pimelylcarnitine                           | 23.452 |
| 41 | 8.857 | 3.472 | 0.017 | 242.0805 | AMIDE | M-H | Cytidine                                   | 8.117  |
| 42 | 8.857 | 1.013 | 0.014 | 243.0835 | AMIDE | M-H | Uridine                                    | 0.675  |
| 43 | 8.88  | 1.827 | 0.006 | 255.1429 | T3    | M+H | Palmitoleic acid                           | 0.043  |
| 44 | 8.897 | 2.028 | 0.024 | 471.1592 | AMIDE | M+H | 1-Phosphatidyl-1D-myo-inositol 3-phosphate | 15.913 |
| 45 | 9.022 | 2.116 | 0     | 808.273  | AMIDE | M-H | Acetyl-CoA                                 | 1.986  |
| 46 | 9.101 | 4.742 | 0.005 | 214.0489 | AMIDE | M-H | Glycerolphosphorylethanolamine             | 12.328 |
| 47 | 9.225 | 1.376 | 0.004 | 282.0651 | AMIDE | M-H | Guanosine                                  | 1.049  |
| 48 | 9.346 | 1.63  | 0.002 | 624.1823 | AMIDE | M-H | Leukotriene C4                             | 1.538  |
| 49 | 9.992 | 1.614 | 0.002 | 665.3125 | T3    | M+H | NAD <sup>+</sup>                           | 0.258  |
| 50 | 10.33 | 1.757 | 0.033 | 333.0594 | AMIDE | M-H | Prostaglandin B2                           | 2.233  |
| 51 | 10.56 | 1.133 | 0.008 | 334.1258 | AMIDE | M-H | S-Formylglutathione                        | 0.79   |
| 52 | 10.88 | 1.595 | 0.005 | 279.1436 | T3    | M+H | Alpha-Linolenic acid                       | -0.121 |

|    |       |       |       |          |       |     |                               |        |
|----|-------|-------|-------|----------|-------|-----|-------------------------------|--------|
| 53 | 11.02 | 1.28  | 0.032 | 508.3249 | T3    | M+H | ATP                           | 0.278  |
| 54 | 11.03 | 1.497 | 0.007 | 221.0602 | AMIDE | M-H | Cystathionine                 | 1.359  |
| 55 | 11.32 | 1.18  | 0.019 | 300.3377 | AMIDE | M+H | Sphingosine                   | 5.131  |
| 56 | 11.51 | 1.915 | 0     | 524.2831 | T3    | M+H | Xanthosine 5-triphosphate     | 4.546  |
| 57 | 11.52 | 1.281 | 0.045 | 116.0708 | AMIDE | M+H | L-Proline                     | 7.775  |
| 58 | 11.53 | 1.738 | 0.043 | 133.0974 | AMIDE | M+H | Glutaric acid                 | 14.122 |
| 59 | 12.53 | 3.599 | 0     | 389.2858 | T3    | M-H | 1-Phosphatidyl-D-myo-inositol | 5.298  |
| 60 | 12.54 | 1.733 | 0     | 147.0238 | T3    | M-H | Trans-Cinnamic acid           | 1.212  |
| 61 | 12.89 | 2.023 | 0.006 | 700.5618 | T3    | M-H | CerP(d18:1/22:0)              | 1.809  |
| 62 | 13.48 | 1.824 | 0.012 | 336.3422 | T3    | M-H | S-(Hydroxymethyl)glutathione  | 1.644  |
| 63 | 14.39 | 1.949 | 0     | 257.2312 | T3    | M+H | Palmitic acid                 | 1.001  |
| 64 | 14.45 | 1.002 | 0.031 | 160.1811 | AMIDE | M+H | Aminopropylcadaverine         | 4.247  |
| 65 | 14.94 | 1.164 | 0.001 | 734.5755 | T3    | M-H | PS(16:0/16:0)                 | 0.59   |

CLs, Cationic liposomes group; C, Control group.

Fold change was calculated as the logarithm of the average mass response (area) ratio between the two groups (fold change =  $\log_2$  [CLs/C]).

Table S2. Differentially expressed proteins in the CLs group identified by the iTRAQ based quantitative proteomics approach.

| Accession | Protein description                                  | FC    | p-val  | Peptides | Unused | Gene Name |
|-----------|------------------------------------------------------|-------|--------|----------|--------|-----------|
| sp P23528 | Cofilin-1                                            | 0.099 | 0.0408 | 233      | 55.98  | CFL1      |
| sp P13639 | Elongation factor 2                                  | 0.103 | 0.0002 | 19       | 173.91 | EEF2      |
| sp P08238 | Heat shock protein HSP 90-beta                       | 0.184 | 0.0017 | 23       | 167.69 | HSP90AB1  |
| sp P30085 | UMP-CMP kinase                                       | 0.192 | 0.0002 | 836      | 21.99  | CMPK1     |
| sp P68104 | Elongation factor 1-alpha 1                          | 0.198 | 0.0029 | 34       | 136.18 | EEF1A1    |
| sp P17987 | T-complex protein 1 subunit alpha                    | 0.211 | 0.0003 | 117      | 81.57  | TCP1      |
| sp P60842 | Eukaryotic initiation factor 4A-I                    | 0.265 | 0.0066 | 141      | 74.18  | EIF4A1    |
| sp P23588 | Eukaryotic translation initiation factor 4B          | 0.305 | 0.0001 | 242      | 55.13  | EIF4B     |
| sp P50991 | T-complex protein 1 subunit delta                    | 0.305 | 0.0003 | 142      | 74.03  | CCT4      |
| sp P78371 | T-complex protein 1 subunit beta                     | 0.305 | 0.0002 | 83       | 96.04  | CCT2      |
| sp P31153 | S-adenosylmethionine synthase isoform type-2         | 0.308 | 0.0023 | 933      | 19.8   | MAT2A     |
| sp P61081 | NEDD8-conjugating enzyme Ubc12                       | 0.347 | 0.0023 | 1279     | 13.69  | UBE2M     |
| sp P30520 | Adenylosuccinate synthetase isozyme 2                | 0.356 | 0.0037 | 468      | 34.88  | ADSS      |
| sp P06493 | Cyclin-dependent kinase 1                            | 0.402 | 0.0095 | 533      | 31.7   | CDK1      |
| sp Q14376 | UDP-glucose 4-epimerase                              | 0.406 | 0.0119 | 1409     | 12.14  | GALE      |
| sp Q13347 | Eukaryotic translation initiation factor 3 subunit I | 0.409 | 0.0228 | 484      | 34.03  | EIF3I     |

|           |                                                                  |       |        |      |        |        |
|-----------|------------------------------------------------------------------|-------|--------|------|--------|--------|
| sp Q15181 | Inorganic pyrophosphatase                                        | 0.413 | 0.0006 | 410  | 38.65  | PPA1   |
| sp Q04760 | Lactoylglutathione lyase                                         | 0.421 | 0.0045 | 1590 | 10.17  | GLO1   |
| sp Q04637 | Eukaryotic translation initiation factor 4 gamma 1               | 0.425 | 0.0032 | 115  | 82.5   | EIF4G1 |
| sp P15170 | CBR1                                                             | 0.437 | 0.0282 | 322  | 44.84  | GSPT1  |
| sp P46779 | 60S ribosomal protein L28                                        | 0.441 | 0.0211 | 901  | 20.43  | RPL28  |
| sp P15531 | Nucleoside diphosphate kinase A                                  | 0.461 | 0.004  | 328  | 44.61  | NME1   |
| sp P30044 | Peroxiredoxin-5, mitochondrial                                   | 0.483 | 0.0038 | 192  | 62.96  | PRDX5  |
| sp P19623 | Spermidine synthase                                              | 0.488 | 0.0113 | 849  | 21.64  | SRM    |
| sp O95340 | Bifunctional 3'-phosphoadenosine 5'-phosphosulfate synthase 2    | 0.53  | 0.0382 | 330  | 44.46  | PAPSS2 |
| sp Q01581 | Hydroxymethylglutaryl-CoA synthase, cytoplasmic                  | 0.545 | 0.0261 | 273  | 50.56  | HMGCS1 |
| sp P13929 | Beta-enolase                                                     | 0.555 | 0.0136 | 446  | 36.46  | ENO3   |
| sp P10809 | 60 kDa heat shock protein, mitochondrial                         | 0.565 | 0.0051 | 29   | 148.94 | HSPD1  |
| sp P11586 | C-1-tetrahydrofolate synthase, cytoplasmic                       | 0.586 | 0.0398 | 97   | 89.56  | MTHFD1 |
| sp P60174 | Triosephosphate isomerase                                        | 0.619 | 0.0332 | 87   | 95.3   | TPI1   |
| sp Q06210 | Glutamine--fructose-6-phosphate aminotransferase [isomerizing] 1 | 0.619 | 0.0139 | 276  | 50.03  | GFPT1  |
| sp P16152 | Carbonyl reductase [NADPH] 1                                     | 0.637 | 0.0136 | 477  | 34.47  | CBR1   |
| sp Q16851 | UTP--glucose-1-phosphate uridylyltransferase                     | 0.643 | 0.021  | 367  | 40.99  | UGP2   |
| sp P37268 | Squalene synthase                                                | 0.649 | 0.0086 | 748  | 24.55  | FDFT1  |
| sp Q99613 | Eukaryotic translation initiation factor 3 subunit C             | 0.661 | 0.0095 | 417  | 38.33  | EIF3C  |



|           |                                                                          |       |        |      |        |          |
|-----------|--------------------------------------------------------------------------|-------|--------|------|--------|----------|
| sp P55884 | Eukaryotic translation initiation factor 3 subunit B                     | 1.541 | 0.0494 | 275  | 50.17  | EIF3B    |
| sp Q96RP9 | Elongation factor G, mitochondrial                                       | 1.584 | 0.0183 | 388  | 39.94  | GFM1     |
| sp P31040 | Succinate dehydrogenase [ubiquinone] flavoprotein subunit, mitochondrial | 1.691 | 0.0152 | 288  | 47.87  | SDHA     |
| sp P47985 | Cytochrome b-c1 complex subunit Rieske, mitochondrial                    | 1.753 | 0.0342 | 1584 | 10.19  | UQCRFS1  |
| sp P22695 | Cytochrome b-c1 complex subunit 2, mitochondrial                         | 1.836 | 0.0059 | 235  | 55.72  | UQCRC2   |
| sp P31930 | Cytochrome b-c1 complex subunit 1, mitochondrial                         | 1.871 | 0.0154 | 333  | 44.06  | UQCRC1   |
| sp Q99714 | 3-hydroxyacyl-CoA dehydrogenase type-2                                   | 1.905 | 0.0021 | 156  | 71.22  | HSD17B10 |
| sp O00116 | Alkyldihydroxyacetonephosphate synthase, peroxisomal                     | 1.923 | 0.0411 | 462  | 35.11  | AGPS     |
| sp P11021 | 78 kDa glucose-regulated protein                                         | 1.976 | 0.0008 | 37   | 132.39 | HSPA5    |
| sp P55809 | Succinyl-CoA:3-ketoacid coenzyme A transferase 1, mitochondrial          | 2.014 | 0.0132 | 247  | 54.77  | OXCT1    |
| sp O60568 | Procollagen-lysine,2-oxoglutarate 5-dioxygenase 3                        | 2.032 | 0.0256 | 244  | 54.96  | PLOD3    |
| sp P51659 | Peroxisomal multifunctional enzyme type 2                                | 2.051 | 0.0382 | 213  | 59.35  | HSD17B4  |
| sp P48506 | Glutamate--cysteine ligase catalytic subunit                             | 2.051 | 0.0319 | 979  | 18.63  | GCLC     |
| sp Q9Y6K5 | 2'-5'-oligoadenylate synthase 3                                          | 2.187 | 0.0167 | 659  | 26.94  | OAS3     |
| sp P04062 | Glucosylceramidase                                                       | 2.187 | 0.0168 | 1363 | 12.59  | GBA      |
| sp P27824 | Calnexin                                                                 | 2.187 | 0.0002 | 125  | 78.64  | CANX     |
| sp P39023 | 60S ribosomal protein L3                                                 | 2.249 | 0.0052 | 291  | 47.72  | RPL3     |
| sp P27635 | 60S ribosomal protein L10                                                | 2.249 | 0.0117 | 630  | 28.22  | RPL10    |
| sp Q8NBJ5 | Procollagen galactosyltransferase 1                                      | 2.249 | 0.0009 | 302  | 46.62  | COLGALT1 |

|           |                                                                      |       |        |      |        |          |
|-----------|----------------------------------------------------------------------|-------|--------|------|--------|----------|
| sp Q96C36 | Pyrroline-5-carboxylate reductase 2                                  | 2.269 | 0.0194 | 566  | 30.36  | PYCR2    |
| sp P60228 | Eukaryotic translation initiation factor 3 subunit E                 | 2.312 | 0.0489 | 438  | 36.81  | EIF3E    |
| sp P49189 | 4-trimethylaminobutyraldehyde dehydrogenase                          | 2.312 | 0.0004 | 646  | 27.39  | ALDH9A1  |
| sp Q13423 | NAD(P) transhydrogenase, mitochondrial                               | 2.355 | 0.0061 | 200  | 61.85  | NNT      |
| sp P55084 | Trifunctional enzyme subunit beta, mitochondrial                     | 2.355 | 0.0009 | 251  | 54.06  | HADHB    |
| sp P53597 | Succinate--CoA ligase [ADP/GDP-forming] subunit alpha, mitochondrial | 2.398 | 0.0121 | 980  | 18.62  | SUCLG1   |
| sp P31939 | Bifunctional purine biosynthesis protein PURH                        | 2.398 | 0.0009 | 182  | 65.13  | ATIC     |
| sp P31939 | Bifunctional purine biosynthesis protein PURH                        | 2.398 | 0.0009 | 182  | 65.13  | ATIC     |
| sp O00410 | Importin-5                                                           | 2.421 | 0.0121 | 179  | 65.27  | IPO5     |
| sp P48047 | ATP synthase subunit O, mitochondrial                                | 2.443 | 0.0206 | 771  | 23.7   | ATP5O    |
| sp P22392 | Nucleoside diphosphate kinase B                                      | 2.488 | 0.0005 | 1171 | 15.72  | NME2     |
| sp P49411 | Elongation factor Tu, mitochondrial                                  | 2.511 | 0.0013 | 134  | 76.56  | TUFM     |
| sp O75390 | Citrate synthase, mitochondrial                                      | 2.511 | 0.0125 | 203  | 60.88  | CS       |
| sp P43490 | Nicotinamide phosphoribosyltransferase                               | 2.558 | 0.0138 | 937  | 19.75  | NAMPT    |
| sp P06576 | ATP synthase subunit beta, mitochondrial                             | 2.558 | 0.0007 | 50   | 119.6  | ATP5B    |
| sp P40939 | Trifunctional enzyme subunit alpha, mitochondrial                    | 2.63  | 0.0001 | 91   | 93.27  | HADHA    |
| sp P14625 | Endoplasmin                                                          | 2.631 | 0.0003 | 42   | 126.88 | HSP90B1  |
| sp P43034 | Platelet-activating factor acetylhydrolase IB subunit alpha          | 2.654 | 0.0057 | 1215 | 14.8   | PAFAH1B1 |
| sp P38646 | Stress-70 protein, mitochondrial                                     | 2.857 | 0.0001 | 4669 | 129.31 | HSPA9    |

|           |                                                            |       |        |      |        |          |
|-----------|------------------------------------------------------------|-------|--------|------|--------|----------|
| sp P08243 | Asparagine synthetase [glutamine-hydrolyzing]              | 2.937 | 0.0028 | 1304 | 13.31  | ASNS     |
| sp P11172 | Uridine 5'-monophosphate synthase                          | 3.311 | 0.0461 | 1202 | 15.03  | UMPS     |
| sp P54886 | Delta-1-pyrroline-5-carboxylate synthase                   | 3.311 | 0.0046 | 217  | 58.45  | ALDH18A1 |
| sp P19367 | Hexokinase-1                                               | 3.341 | 0.0011 | 90   | 93.61  | HK1      |
| sp P00390 | Glutathione reductase, mitochondrial                       | 4.166 | 0.0215 | 524  | 32.12  | GSR      |
| sp Q8IV08 | Phospholipase D3                                           | 4.365 | 0.0059 | 2834 | 3.75   | PLD3     |
| sp O43837 | Isocitrate dehydrogenase [NAD] subunit beta, mitochondrial | 4.528 | 0.0097 | 1240 | 14.43  | IDH3B    |
| sp P09651 | Heterogeneous nuclear ribonucleoprotein A1                 | 4.528 | 0.0218 | 71   | 98.95  | HNRNPA1  |
| sp P99999 | Cytochrome c                                               | 4.613 | 0.0283 | 967  | 18.94  | CYCS     |
| sp P61247 | 40S ribosomal protein S3a                                  | 4.786 | 0.0077 | 298  | 46.93  | RPS3A    |
| sp P22102 | Trifunctional purine biosynthetic protein adenosine-3      | 4.786 | 0.0007 | 208  | 60.11  | GART     |
| sp P08670 | Vimentin                                                   | 4.875 | 0.0004 | 35   | 135.88 | VIM      |
| sp P47712 | Cytosolic phospholipase A2                                 | 4.875 | 0.0013 | 672  | 26.69  | PLA2G4A  |
| sp O14561 | Acyl carrier protein, mitochondrial                        | 5.152 | 0.0054 | 1317 | 13.09  | NDUFAB1  |
| sp P37837 | Transaldolase                                              | 5.296 | 0.0001 | 216  | 58.58  | TALDO1   |
| sp P62899 | 60S ribosomal protein L31                                  | 8.953 | 0.0151 | 853  | 21.54  | RPL31    |

Proteins discovered in at least two out of three experiments with unused prot score >2, fold change of >1.5 or  $\leq 0.667$ , and P-value  $\leq 0.05$  were presented in the table. Proteins shaded in gray indicate up-regulated, and unshaded are down-regulate.
